# Supplementary material
Source: PubMed Central journal article supplement (PMC3711531)

# Supplemental Figure 1

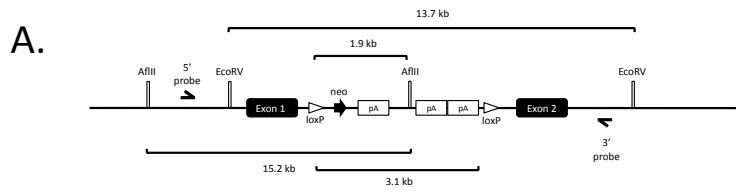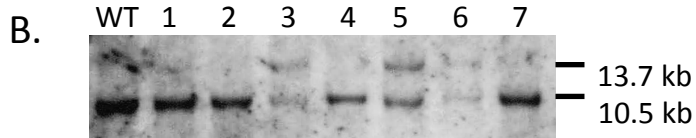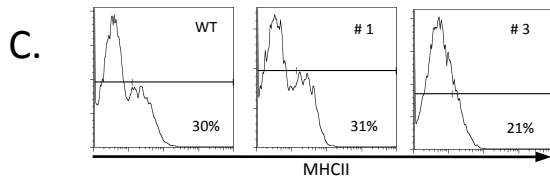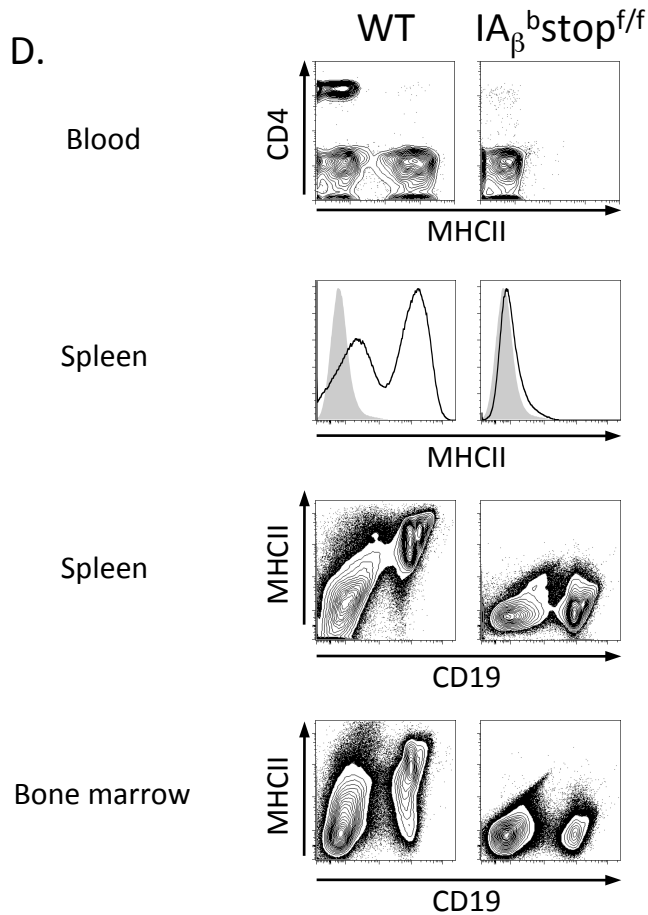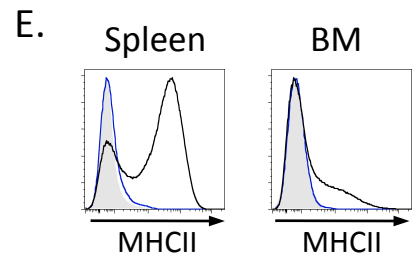

# Supplemental Figure 2

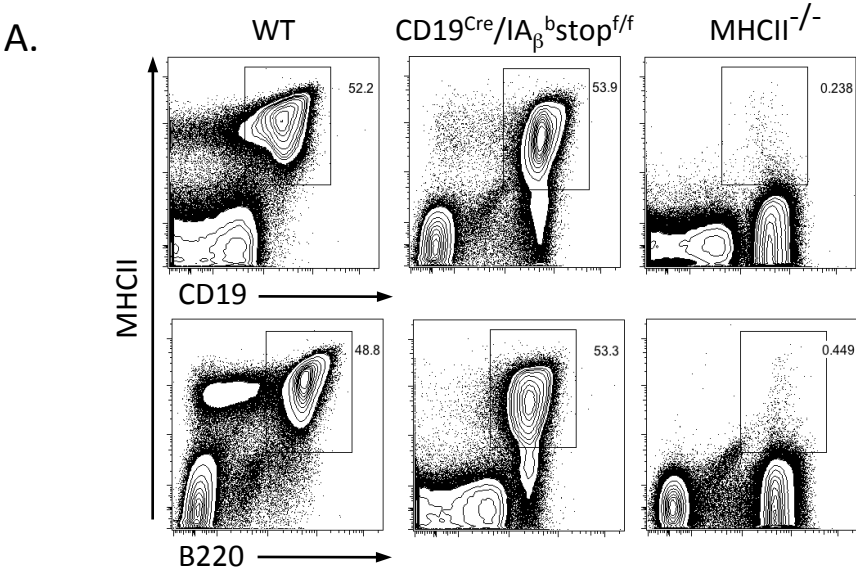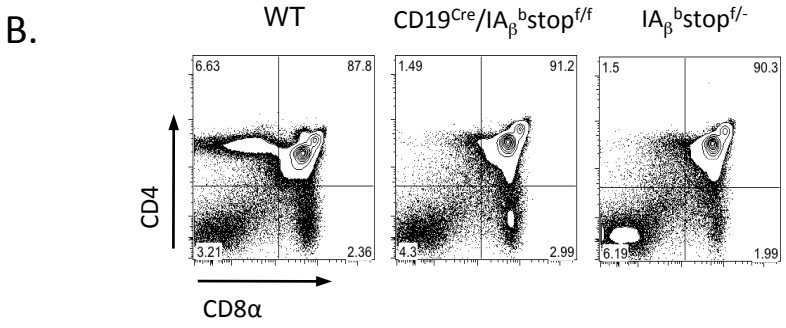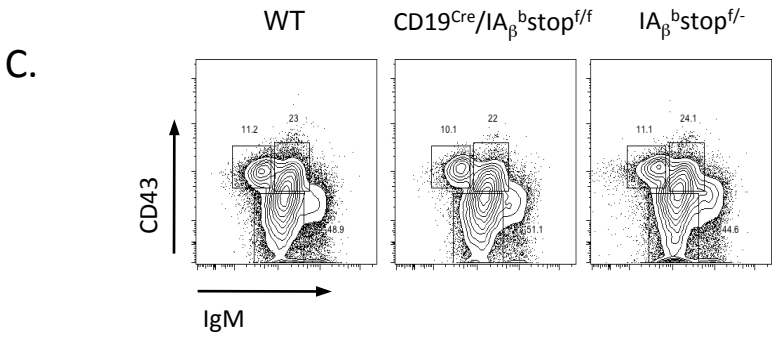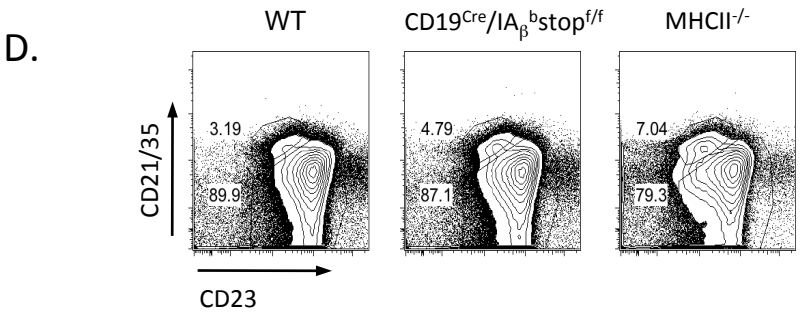

# Supplemental Figure 2

E.

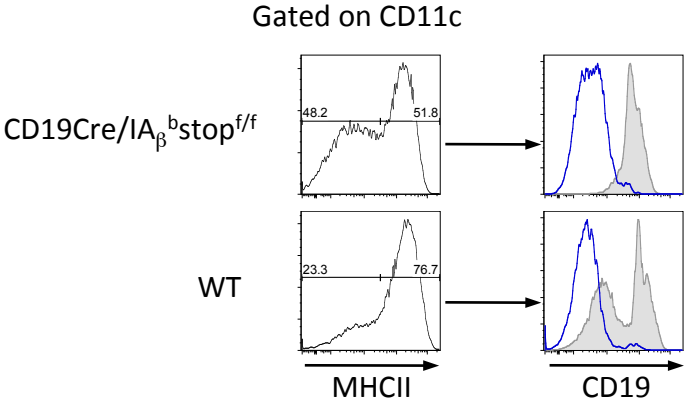

F.

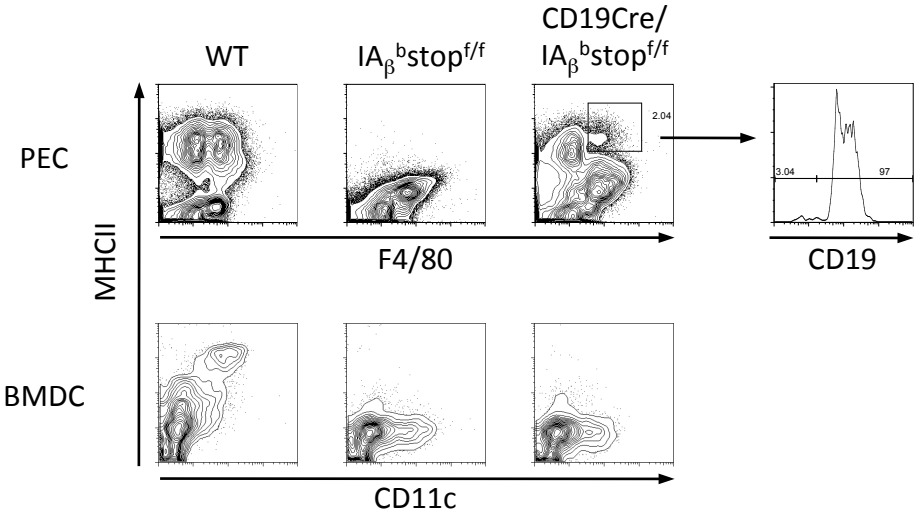

G.

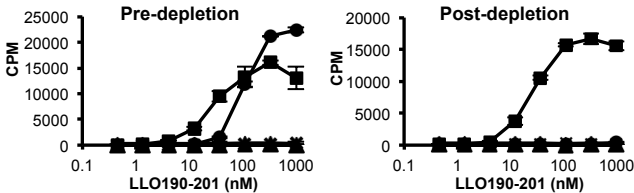

# Supplemental Figure 2

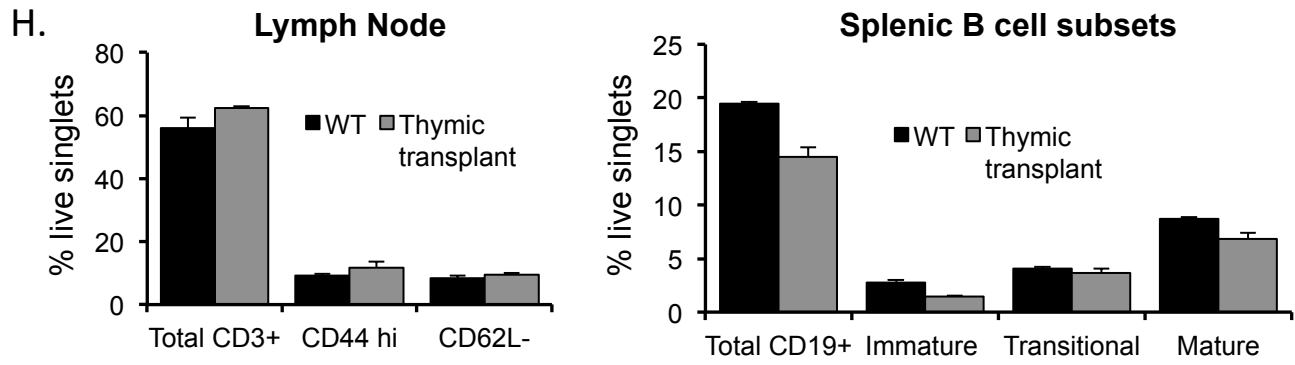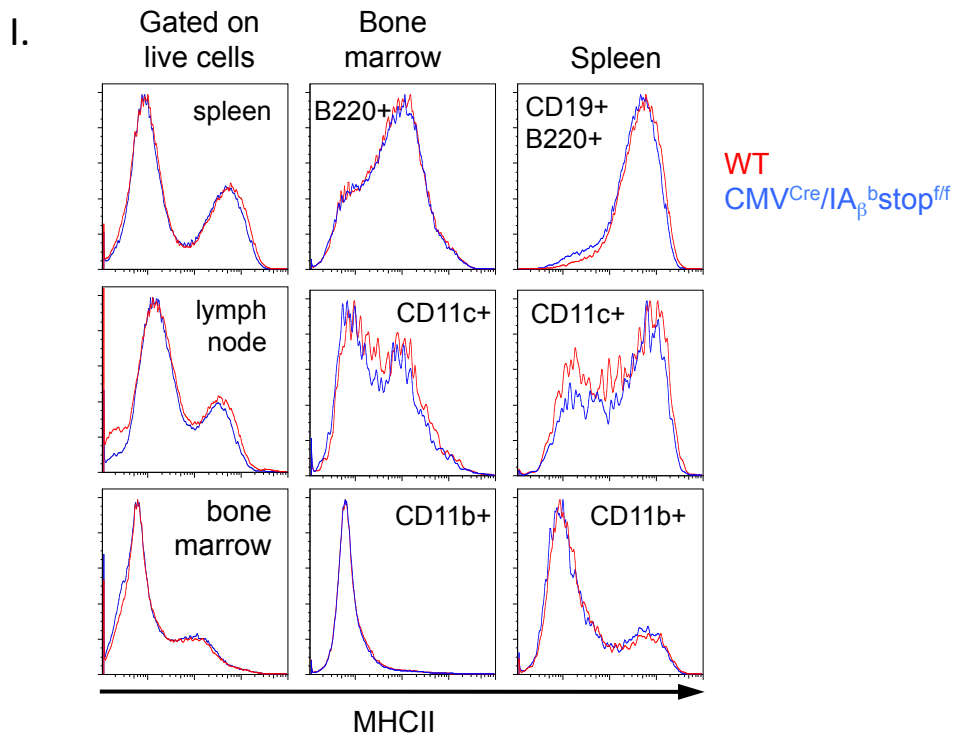

Supplement: NIHMS485629-supplement-1.pdf [file NIHMS485629-supplement-1.pdf]
